# Supplementary material for: A new genus Vittaliana belonging to the tribe Opsiini (Hemiptera: Cicadellidae) from India and its molecular phylogeny
Source: PeerJ journal article supplement (doi:10.7717/peerj.9515), 2020-08-27
Supplement: Maximum_likelihood_tree_(SH-aLRT+aBayes+UFB).pdf [file Maximum_likelihood_tree_%28SH-aLRT%2BaBayes%2BUFB%29.pdf]

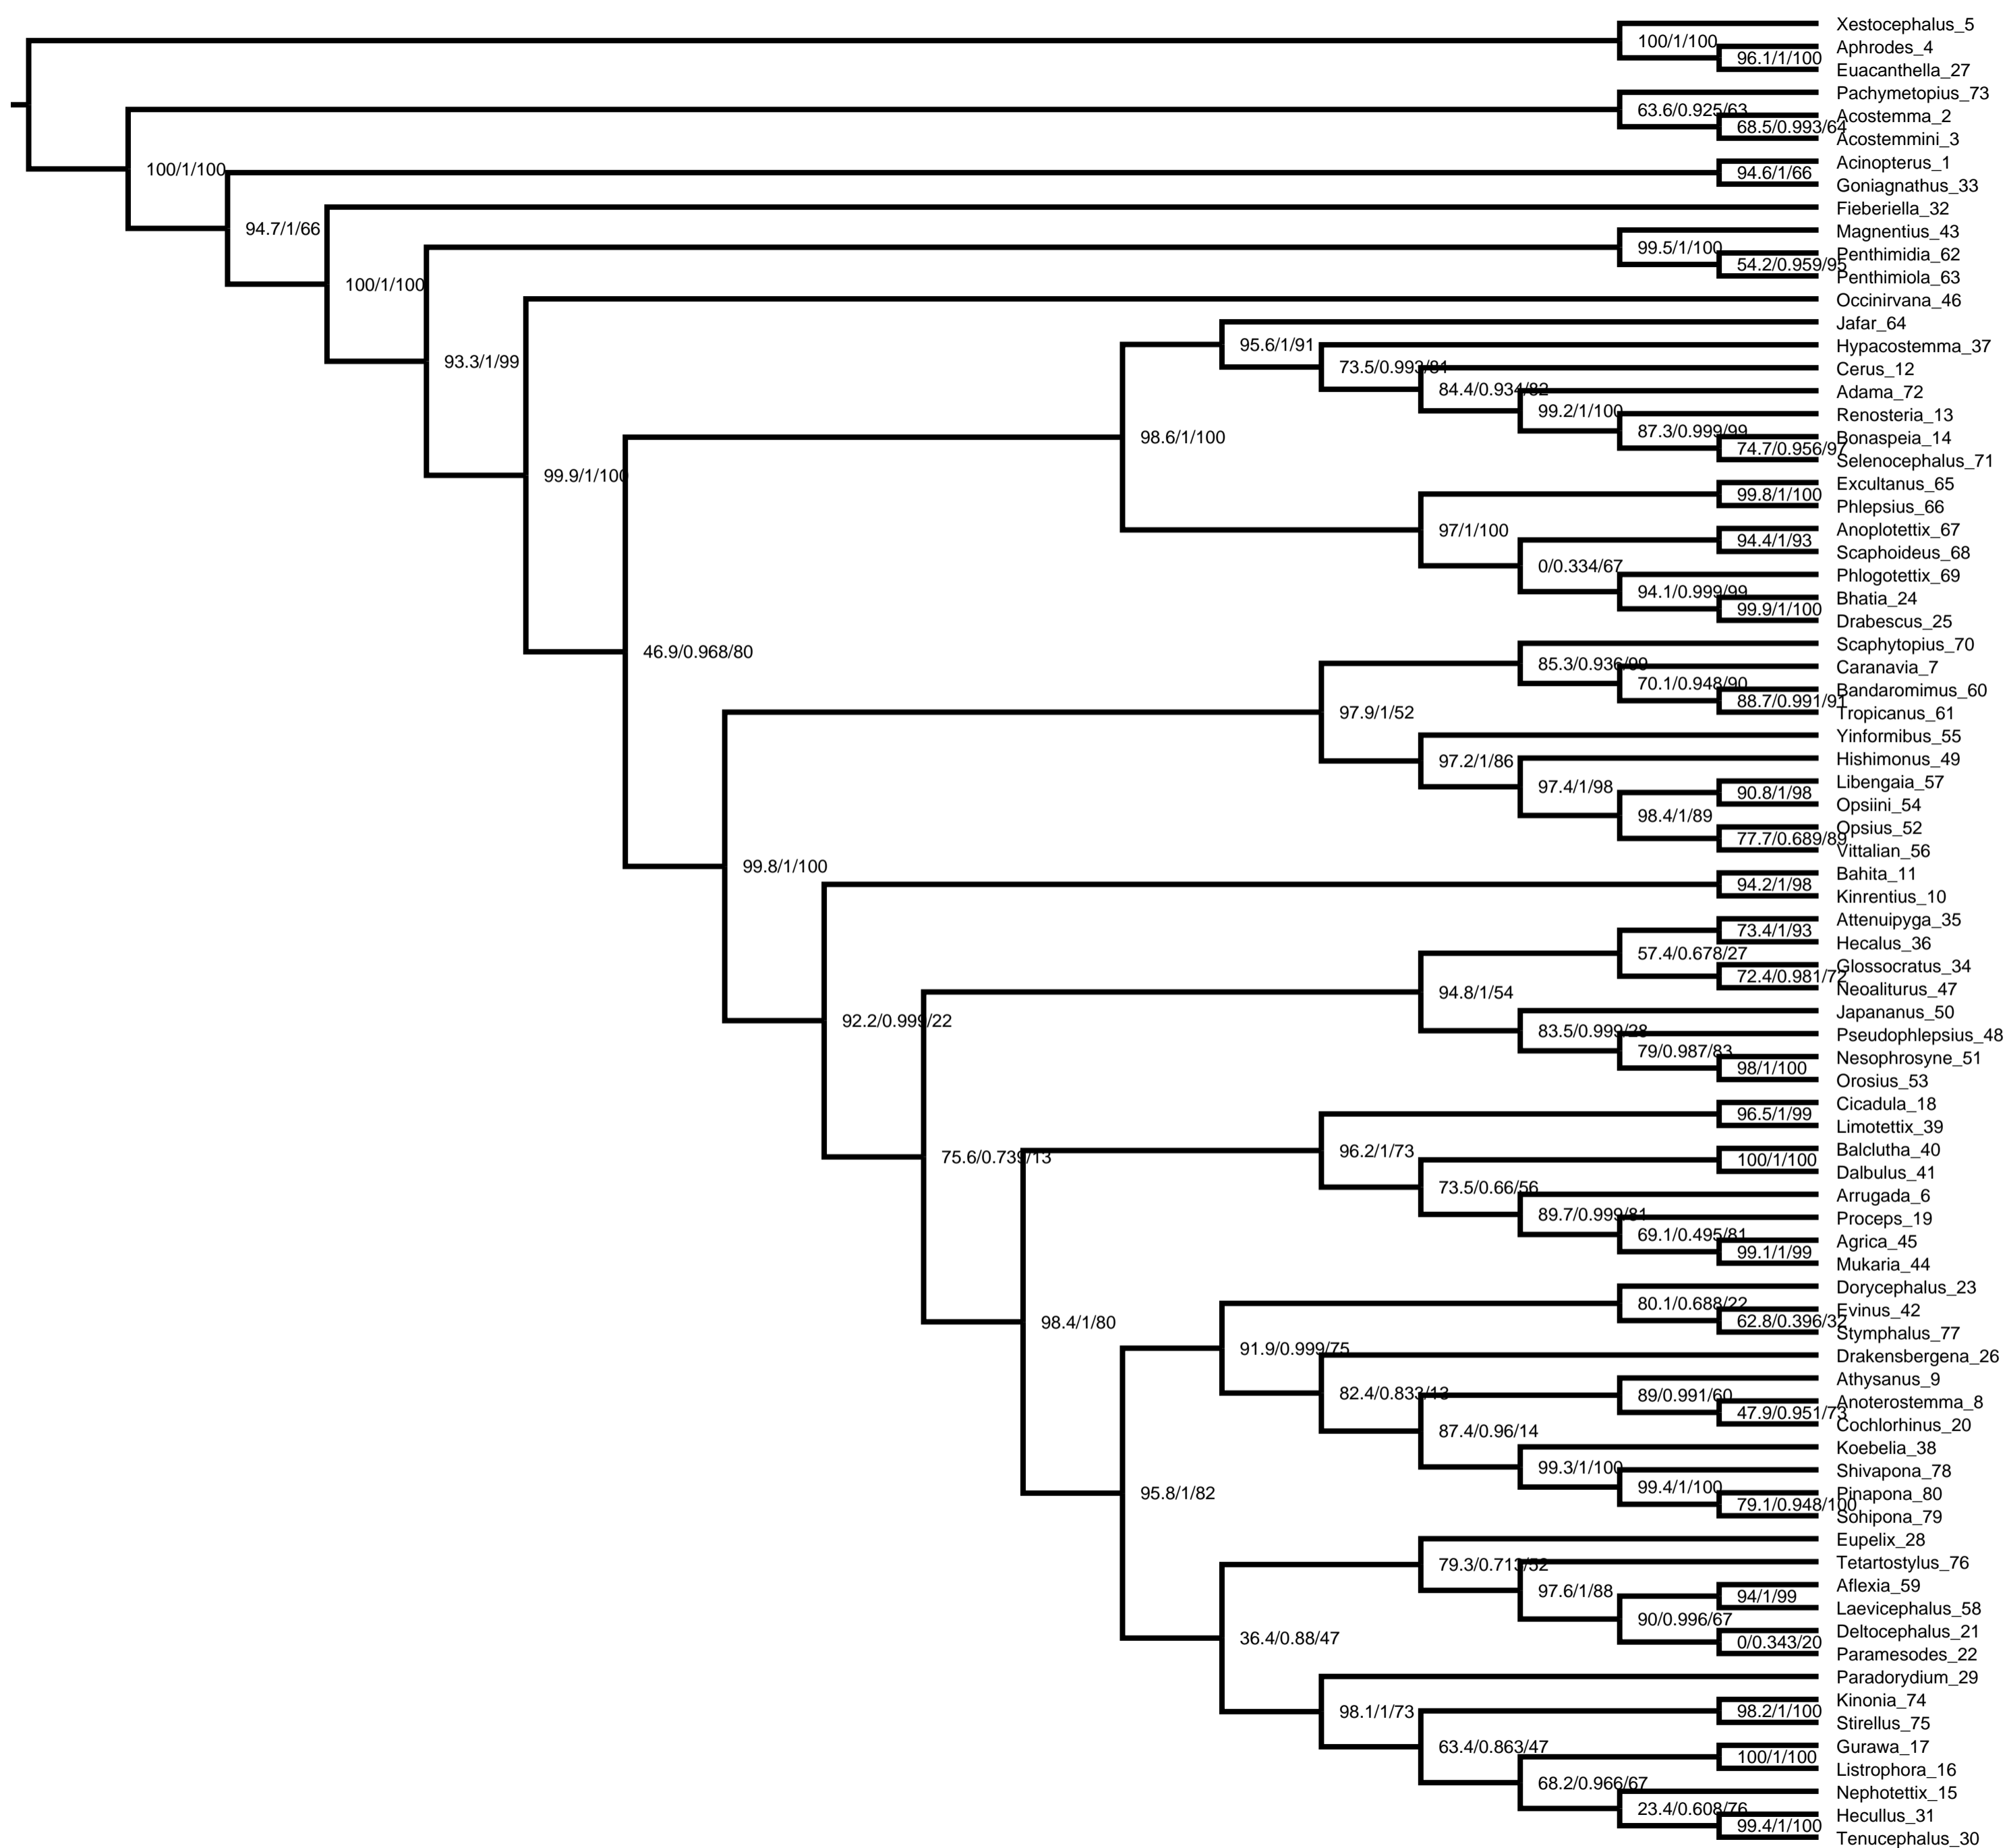

2.0
